# Supplementary material
Source: Springer Nature journal article supplement (https://www.springermedizin.de/resource/supplementary/12957_2014_1760_MOESM1_ESM.pdf/9563424)

sOPN

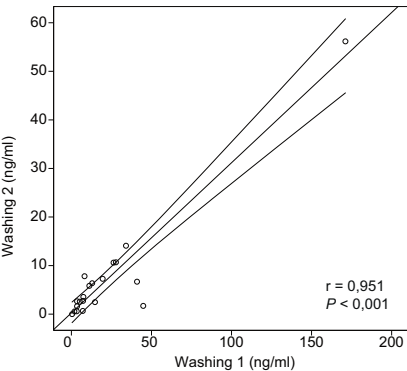

sCD44-v6

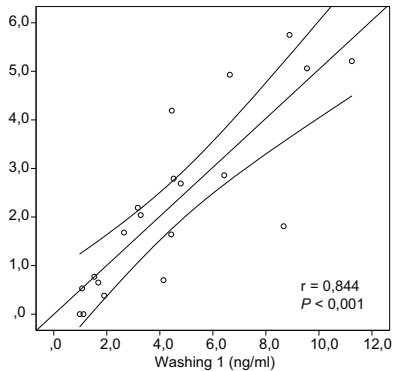

sVCAM-1

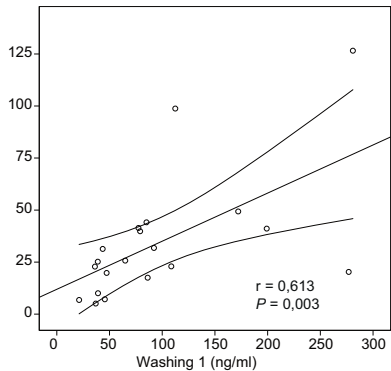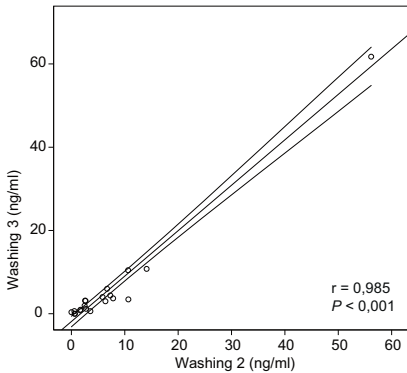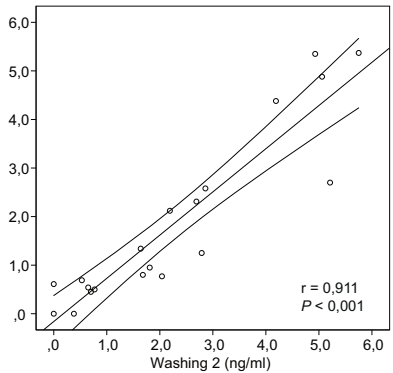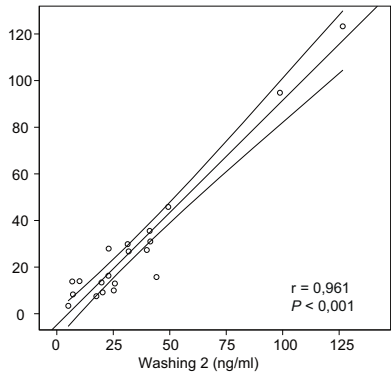

Supplement: MOESM1 [file 9563424]
